# Supplementary material for: A Glimpse into the Diverse Cellular Immunity against SARS-CoV-2
Source: MDPI journal article supplement (doi:10.3390/vaccines9080827), 2021-07-27
Supplement: s1 [file s1]

## Supplementary Materials

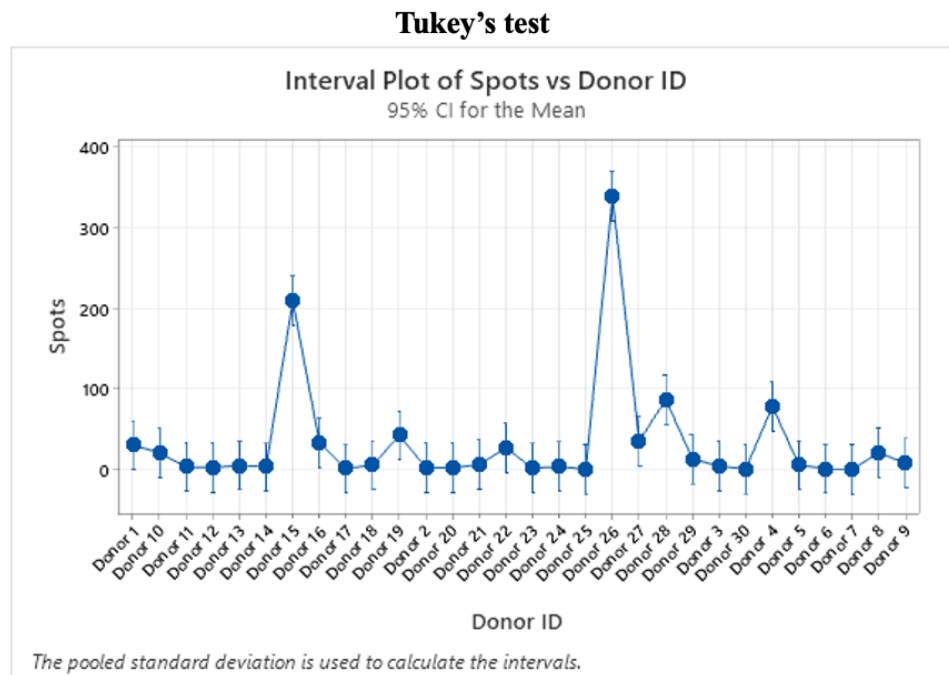

**Figure S1. Interval plot of spots vs. individual donors by one-way ANOVA and Tukey's test for multiple comparisons.** The ELISPOTs of donor #15, #26, #28, and #4 were significantly higher than those of the others ( $P < 0.01$ ).

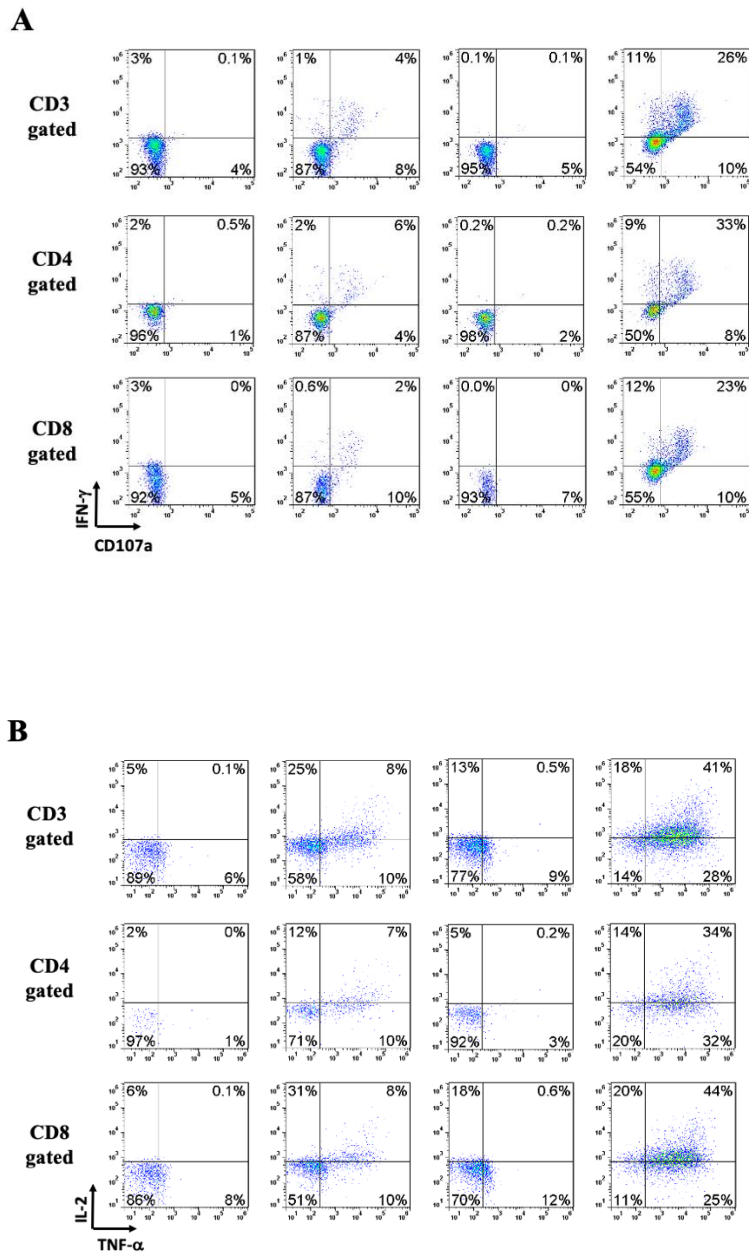

**Figure S2. Additional effector function analysis of T cells against SARS-CoV-2 SEMNP.**

The PBMCs from one of the subjects were activated with the DC-SMENP to stimulate and expand CTL *in vitro* and followed by intracellular analysis of TNF $\alpha$ , IL-2, IFN- $\gamma$  and CD107a in different T cell populations.

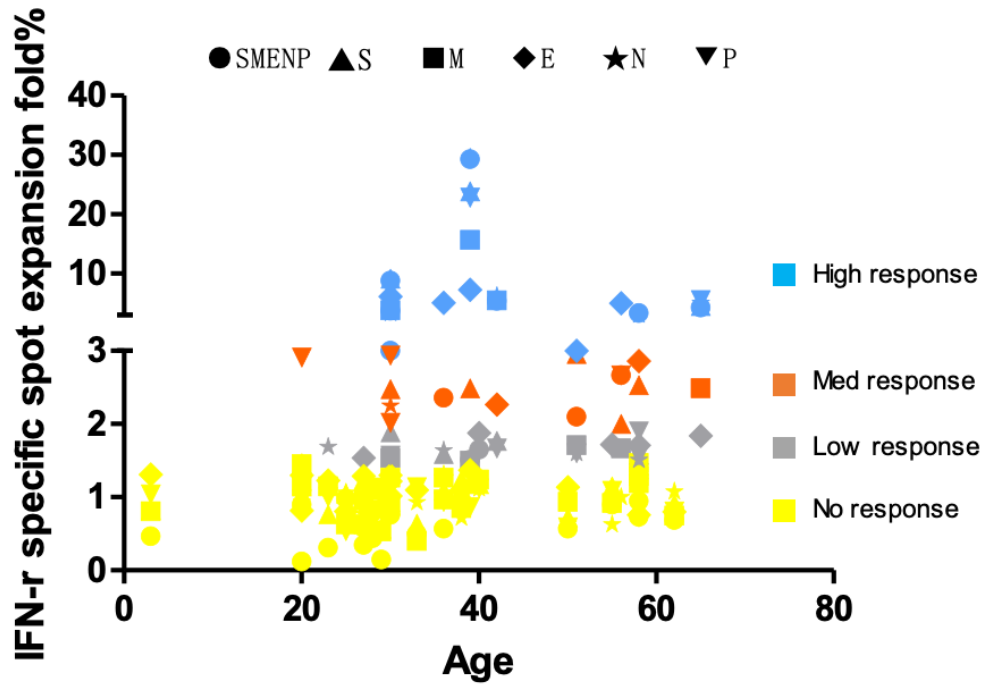

**Figure S3. Individual subjects' immune spot expansion folds by color coding.** The diverse individual immune cell response to the different viral antigens based on fold of increase and age relationship. The reactive individuals are populated mainly in the 30-40 years old range.

**Table S1. Raw data of ELISPOT analyses.**

| Raw data | PBMC | SMENP | S     | M     | E     | N     | P    |
|----------|------|-------|-------|-------|-------|-------|------|
| Donor 1  | 26   | 54.5  | 77    | 44.5  | 78    | 41.5  | 41.5 |
| Donor 2  | 58.5 | 25.5  | 64.5  | 66    | 45.5  | 41.5  | 32   |
| Donor 3  | 34   | 19.5  | 41.5  | 32    | 51.5  | 31    | 27.5 |
| Donor 4  | 58.5 | 221   | 145   | 90    | 71.5  | 198   | 92   |
| Donor 5  | 10.5 | 10    | 14.5  | 12.5  | 30    | 13    | 16.5 |
| Donor 6  | 6.5  | 2     | 5     | 7.5   | 8     | 11    | 6.5  |
| Donor 7  | 26.5 | 4     | 15    | 14    | 28.5  | 16.5  | 22   |
| Donor 8  | 116  | 104   | 168.5 | 134   | 95    | 170.5 | 113  |
| Donor 9  | 16.5 | 2     | 19    | 24    | 21.5  | 15.5  | 48   |
| Donor 10 | 80   | 58.5  | 126.5 | 103   | 61    | 120.5 | 94   |
| Donor 11 | 59   | 27.5  | 49    | 48    | 77    | 49    | 61.5 |
| Donor 12 | 1.5  | 4     | 3     | 2.5   | 7.5   | 1.5   | 4    |
| Donor 13 | 31.5 | 24    | 29.5  | 40    | 41    | 39.5  | 37.5 |
| Donor 14 | 60.5 | 58    | 75    | 51.5  | 66.5  | 43.5  | 60   |
| Donor 15 | 70   | 299   | 318   | 174.5 | 129   | 358.5 | 392  |
| Donor 16 | 24.5 | 82.5  | 62    | 36    | 42    | 76    | 46.5 |
| Donor 17 | 35   | 17.5  | 22.5  | 14    | 38.5  | 32.5  | 40   |
| Donor 18 | 35   | 20    | 38    | 34    | 55    | 46    | 33   |
| Donor 19 | 15   | 81    | 26.5  | 83    | 34    | 93.5  | 25   |
| Donor 20 | 41   | 14.5  | 41    | 26    | 53    | 31.5  | 40   |
| Donor 21 | 39.5 | 35.5  | 45.5  | 36.5  | 68    | 25    | 43   |
| Donor 22 | 52   | 78.5  | 129.5 | 78    | 71    | 63    | 45   |
| Donor 23 | 77.5 | 44.5  | 55.5  | 73    | 88.5  | 49.5  | 45.5 |
| Donor 24 | 8.5  | 14    | 10    | 10.5  | 16    | 8.5   | 14   |
| Donor 25 | 31.5 | 31    | 33    | 20    | 25.5  | 33.5  | 17   |
| Donor 26 | 16.5 | 484   | 394   | 259   | 121   | 487.5 | 377  |
| Donor 27 | 40.5 | 121.5 | 76.5  | 35.5  | 41.5  | 91    | 82   |
| Donor 28 | 18   | 159   | 165.5 | 68.5  | 110.5 | 70    | 53   |
| Donor 29 | 11   | 26    | 17.5  | 14    | 56    | 18    | 13   |
| Donor 30 | 59.5 | 41    | 54    | 44.5  | 47.5  | 64.5  | 48   |

Note: PBMC IFN- $\gamma$  ELISPOT assay of 30 healthy donors

**Table S2. Raw data of ELISPOT analyses after background correction.**

| Background correction | SMENP | S     | M     | E     | N     | P     |
|-----------------------|-------|-------|-------|-------|-------|-------|
| Donor 1               | 28.5  | 51    | 18.5  | 52    | 15.5  | 15.5  |
| Donor 2               | 0     | 6     | 7.5   | 0     | 0     | 0     |
| Donor 3               | 0     | 7.5   | 0     | 17.5  | 0     | 0     |
| Donor 4               | 162.5 | 86.5  | 31.5  | 13    | 139.5 | 33.5  |
| Donor 5               | 0     | 4     | 2     | 19.5  | 2.5   | 6     |
| Donor 6               | 0     | 0     | 1     | 1.5   | 4.5   | 0     |
| Donor 7               | 0     | 0     | 0     | 2     | 0     | 0     |
| Donor 8               | 0     | 52.5  | 18    | 0     | 54.5  | 0     |
| Donor 9               | 0     | 2.5   | 7.5   | 5     | 0     | 31.5  |
| Donor 10              | 0     | 46.5  | 23    | 0     | 40.5  | 14    |
| Donor 11              | 0     | 0     | 0     | 18    | 0     | 2.5   |
| Donor 12              | 2.5   | 1.5   | 1     | 6     | 0     | 2.5   |
| Donor 13              | 0     | 0     | 8.5   | 9.5   | 8     | 6     |
| Donor 14              | 0     | 14.5  | 0     | 6     | 0     | 0     |
| Donor 15              | 229   | 248   | 104.5 | 59    | 288.5 | 322   |
| Donor 16              | 58    | 37.5  | 11.5  | 17.5  | 51.5  | 22    |
| Donor 17              | 0     | 0     | 0     | 3.5   | 0     | 5     |
| Donor 18              | 0     | 3     | 0     | 20    | 11    | 0     |
| Donor 19              | 66    | 11.5  | 68    | 19    | 78.5  | 10    |
| Donor 20              | 0     | 0     | 0     | 12    | 0     | 0     |
| Donor 21              | 0     | 6     | 0     | 28.5  | 0     | 3.5   |
| Donor 22              | 26.5  | 77.5  | 26    | 19    | 11    | 0     |
| Donor 23              | 0     | 0     | 0     | 11    | 0     | 0     |
| Donor 24              | 5.5   | 1.5   | 2     | 7.5   | 0     | 5.5   |
| Donor 25              | 0     | 1.5   | 0     | 0     | 2     | 0     |
| Donor 26              | 467.5 | 377.5 | 242.5 | 104.5 | 471   | 360.5 |
| Donor 27              | 81    | 36    | 0     | 1     | 50.5  | 41.5  |
| Donor 28              | 141   | 147.5 | 50.5  | 92.5  | 52    | 35    |
| Donor 29              | 15    | 6.5   | 3     | 45    | 7     | 2     |
| Donor 30              | 0     | 0     | 0     | 0     | 5     | 0     |

**Table S3. Raw data of ELISPOT analyses of the different viral antigens based on fold of increase.**

| Fold     | SMENP | S     | M     | E    | N     | P     |
|----------|-------|-------|-------|------|-------|-------|
| Donor 1  | 2.10  | 2.96  | 1.71  | 3.00 | 1.60  | 1.60  |
| Donor 2  | 0.44  | 1.10  | 1.13  | 0.78 | 0.71  | 0.55  |
| Donor 3  | 0.57  | 1.22  | 0.94  | 1.51 | 0.91  | 0.81  |
| Donor 4  | 3.78  | 2.48  | 1.54  | 1.22 | 3.38  | 1.57  |
| Donor 5  | 0.95  | 1.38  | 1.19  | 2.86 | 1.24  | 1.57  |
| Donor 6  | 0.31  | 0.77  | 1.15  | 1.23 | 1.69  | 1.00  |
| Donor 7  | 0.15  | 0.57  | 0.53  | 1.08 | 0.62  | 0.83  |
| Donor 8  | 0.90  | 1.45  | 1.16  | 0.82 | 1.47  | 0.97  |
| Donor 9  | 0.12  | 1.15  | 1.45  | 1.30 | 0.94  | 2.91  |
| Donor 10 | 0.73  | 1.58  | 1.29  | 0.76 | 1.51  | 1.18  |
| Donor 11 | 0.47  | 0.83  | 0.81  | 1.31 | 0.83  | 1.04  |
| Donor 12 | 2.67  | 2.00  | 1.67  | 5.00 | 1.00  | 2.67  |
| Donor 13 | 0.76  | 0.94  | 1.27  | 1.30 | 1.25  | 1.19  |
| Donor 14 | 0.96  | 1.24  | 0.85  | 1.10 | 0.72  | 0.99  |
| Donor 15 | 4.27  | 4.54  | 2.49  | 1.84 | 5.12  | 5.60  |
| Donor 16 | 3.37  | 2.53  | 1.47  | 1.71 | 3.10  | 1.90  |
| Donor 17 | 0.50  | 0.64  | 0.40  | 1.10 | 0.93  | 1.14  |
| Donor 18 | 0.57  | 1.09  | 0.97  | 1.57 | 1.31  | 0.94  |
| Donor 19 | 5.40  | 1.77  | 5.53  | 2.27 | 6.23  | 1.67  |
| Donor 20 | 0.35  | 1.00  | 0.63  | 1.29 | 0.77  | 0.98  |
| Donor 21 | 0.90  | 1.15  | 0.92  | 1.72 | 0.63  | 1.09  |
| Donor 22 | 1.51  | 2.49  | 1.50  | 1.37 | 1.21  | 0.87  |
| Donor 23 | 0.57  | 0.72  | 0.94  | 1.14 | 0.64  | 0.59  |
| Donor 24 | 1.65  | 1.18  | 1.24  | 1.88 | 1.12  | 1.12  |
| Donor 25 | 0.98  | 1.05  | 0.63  | 0.81 | 1.06  | 0.54  |
| Donor 26 | 29.33 | 23.88 | 15.70 | 7.33 | 29.55 | 22.85 |
| Donor 27 | 3.00  | 1.89  | 0.88  | 1.02 | 2.25  | 2.02  |
| Donor 28 | 8.83  | 9.19  | 3.81  | 6.14 | 3.89  | 2.94  |
| Donor 29 | 2.36  | 1.59  | 1.27  | 5.09 | 1.64  | 1.18  |
| Donor 30 | 0.69  | 0.91  | 0.75  | 0.80 | 1.08  | 0.81  |

**Table S4. BLASTP sequence alignment of the SMENP peptides and SARS-CoV, MERS, and other seasonal coronavirus-related CoV strains.**

| Human coronavirus | Peptides | Identities     | Positives      |
|-------------------|----------|----------------|----------------|
| <b>SARS</b>       | <b>S</b> | <b>74%</b>     | <b>81%</b>     |
|                   | <b>M</b> | <b>91%</b>     | <b>96%</b>     |
|                   | <b>E</b> | <b>95%</b>     | <b>96%</b>     |
|                   | <b>N</b> | <b>92%</b>     | <b>96%</b>     |
|                   | <b>P</b> | <b>97%</b>     | <b>99%</b>     |
| <b>MERS</b>       | <b>S</b> | <b>24%</b>     | <b>43%</b>     |
|                   | <b>M</b> | <b>43%</b>     | <b>61%</b>     |
|                   | <b>E</b> | <b>36%</b>     | <b>50%</b>     |
|                   | <b>N</b> | <b>59%</b>     | <b>71%</b>     |
|                   | <b>P</b> | <b>41%</b>     | <b>60%</b>     |
| <b>NL63</b>       | <b>S</b> | <b>&lt;20%</b> | <b>&lt;20%</b> |
|                   | <b>M</b> | <b>31%</b>     | <b>55%</b>     |
|                   | <b>E</b> | <b>18%</b>     | <b>52%</b>     |
|                   | <b>N</b> | <b>48%</b>     | <b>62%</b>     |
|                   | <b>P</b> | <b>36%</b>     | <b>58%</b>     |
| <b>HKU1</b>       | <b>S</b> | <b>25%</b>     | <b>39%</b>     |
|                   | <b>M</b> | <b>36%</b>     | <b>57%</b>     |
|                   | <b>E</b> | <b>31%</b>     | <b>49%</b>     |
|                   | <b>N</b> | <b>46%</b>     | <b>60%</b>     |
|                   | <b>P</b> | <b>40%</b>     | <b>55%</b>     |
| <b>229E</b>       | <b>S</b> | <b>&lt;20%</b> | <b>&lt;20%</b> |
|                   | <b>M</b> | <b>31%</b>     | <b>52%</b>     |
|                   | <b>E</b> | <b>27%</b>     | <b>50%</b>     |
|                   | <b>N</b> | <b>42%</b>     | <b>56%</b>     |
|                   | <b>P</b> | <b>34%</b>     | <b>54%</b>     |
| <b>OC43</b>       | <b>S</b> | <b>26%</b>     | <b>42%</b>     |
|                   | <b>M</b> | <b>41%</b>     | <b>60%</b>     |
|                   | <b>E</b> | <b>32%</b>     | <b>55%</b>     |
|                   | <b>N</b> | <b>47%</b>     | <b>62%</b>     |
|                   | <b>P</b> | <b>37%</b>     | <b>57%</b>     |

Note: We designed the SMENP peptides spanning across the conserved functional domains according to the protein sequence of SARS-CoV-2. The correlated amino acid sequences of SARS-CoV, MERS, and other seasonal CoV-related viral strains from various FASTA databases were analyzed for sequence homology using BLASTP.

**Table S5. Subject age and geographic location**

| #  | Sex    | Age | City             |
|----|--------|-----|------------------|
| 1  | male   | 51  | Guangdong, China |
| 2  | female | 28  | Yunnan, China    |
| 3  | female | 27  | Guangdong, China |
| 4  | female | 30  | Guangdong, China |
| 5  | male   | 58  | Guangdong, China |
| 6  | female | 23  | Guangdong, China |
| 7  | female | 29  | Guangdong, China |
| 8  | male   | 20  | Guangdong, China |
| 9  | female | 20  | Guangdong, China |
| 10 | male   | 58  | Taiwan           |
| 11 | male   | 3   | Guangdong, China |
| 12 | female | 56  | Guangdong, China |
| 13 | male   | 30  | Jiangxi, China   |
| 14 | male   | 38  | Guangxi, China   |
| 15 | female | 65  | Taiwan           |
| 16 | male   | 58  | Mongolia, China  |
| 17 | male   | 33  | Shandong, China  |
| 18 | female | 36  | Guangdong, China |
| 19 | male   | 42  | Guangdong, China |
| 20 | male   | 27  | Shandong, China  |
| 21 | male   | 55  | Hebei, China     |
| 22 | male   | 39  | Hebei, China     |
| 23 | male   | 50  | Mongolia, China  |
| 24 | male   | 40  | Jilin, China     |
| 25 | male   | 25  | Henan, China     |
| 26 | male   | 39  | Hebei, China     |
| 27 | male   | 30  | Hebei, China     |
| 28 | male   | 30  | Guangdong, China |
| 29 | male   | 36  | Taiwan           |
| 30 | male   | 62  | U.S.A            |

Note: According to age, sex and region, 30 donors in this study were tabulated. The minimum age was 3 years old and the maximum was 65 years old.
